# Supplementary material for: Interlaced NiMn-LDH nanosheet decorated NiCo2O4 nanowire arrays on carbon cloth as advanced electrodes for high-performance flexible solid-state hybrid supercapacitors
Source: Royal Society of Chemistry journal article supplement (doi:10.1039/c9dt02227a), 2019-01-01
Supplement: c9dt02227a1.pdf [file c9dt02227a1.pdf]

**Supplementary Material for**  
**Interlaced NiMn-LDH Nanosheets Decorated NiCo<sub>2</sub>O<sub>4</sub> Nanowire Arrays**  
**on Carbon Cloth as Advanced Electrodes for High-performance Flexible**  
**Solid-state Hybrid Supercapacitors**

Hanchun Xia,<sup>a</sup> Geng Li,<sup>a</sup> Haoran Cai,<sup>a</sup> Xiaolong Li,<sup>a</sup> Peiheng Sun,<sup>a</sup> Peijia Wang,<sup>a</sup> Jiajie Huang,<sup>a</sup> Liang Wang,<sup>a</sup> Desuo Zhang,<sup>c</sup> Yefeng Yang<sup>\*a</sup> and Jie Xiong<sup>b</sup>

<sup>a</sup>*Department of Materials Engineering, College of Materials and Textile, Zhejiang Sci-Tech University, Hangzhou 310018, China*

<sup>b</sup>*MOE Key Laboratory of Advanced Textile Materials and Manufacturing Technology, Zhejiang Sci-Tech University, Hangzhou 310018, China*

<sup>c</sup>*National Engineering Laboratory for Modern Silk, College of Textile and Clothing Engineering, Soochow University, Suzhou 215123, China*

Email address: [yangyf@zstu.edu.cn](mailto:yangyf@zstu.edu.cn) (Dr. Y. Yang)

Tel: +86-571-8684 5569

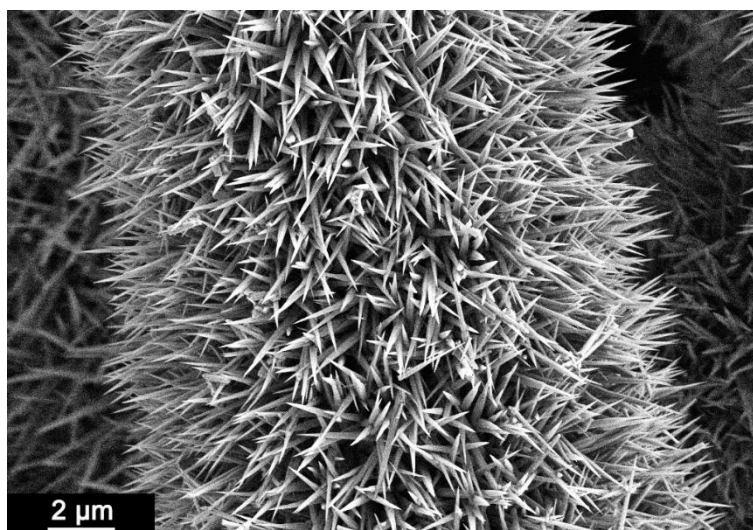

**Figure S1.** Typical SEM image of NiCo precursor NWAs on carbon cloth.

**Table S1.** The calculated mass loading of NiMn-LDH shell and NiCo<sub>2</sub>O<sub>4</sub>@NiMn-LDH at different reaction times for the growth of NiMn-LDH.

| Electrode materials                              | Reaction time of shell materials (h) | Total mass loading (mg/cm <sup>2</sup> ) | Mass loading of NiMn-LDH shell (mg/cm <sup>2</sup> ) |
|--------------------------------------------------|--------------------------------------|------------------------------------------|------------------------------------------------------|
| NiCo <sub>2</sub> O <sub>4</sub> @NiMn-LDH (4h)  | 4                                    | 1.2                                      | 0.4                                                  |
| NiCo <sub>2</sub> O <sub>4</sub> @NiMn-LDH (8h)  | 8                                    | 1.5                                      | 0.7                                                  |
| NiCo <sub>2</sub> O <sub>4</sub> @NiMn-LDH (15h) | 15                                   | 2.4                                      | 1.6                                                  |

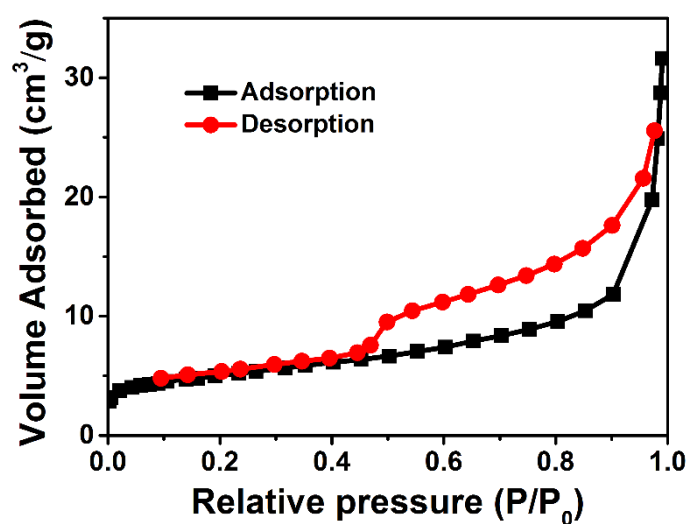

**Figure S2.** N<sub>2</sub> adsorption-desorption isotherms of the NiCo<sub>2</sub>O<sub>4</sub>@NiMn-LDH (8 h) for the calculation of specific surface area with the BET method.

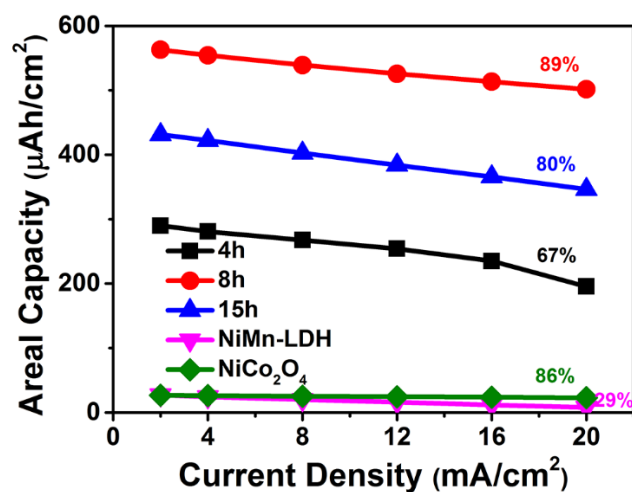

**Figure S3.** Specific capacities of the NiCo<sub>2</sub>O<sub>4</sub>, NiMn-LDH and NiCo<sub>2</sub>O<sub>4</sub>@NiMn-LDH electrodes as a function of current density.

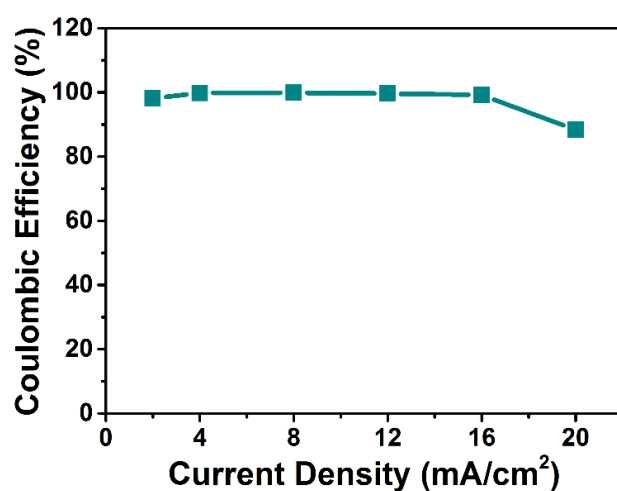

**Figure S4.** The variation of coulombic efficiency for the NiCo<sub>2</sub>O<sub>4</sub>@NiMn-LDH (8 h) electrode as the current density.

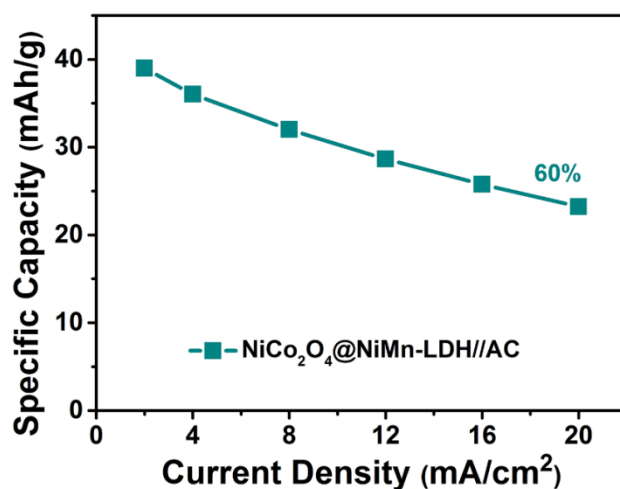

**Figure S5.** Specific capacities of the NiCo<sub>2</sub>O<sub>4</sub>@NiMn-LDH//AC as a function of current density.

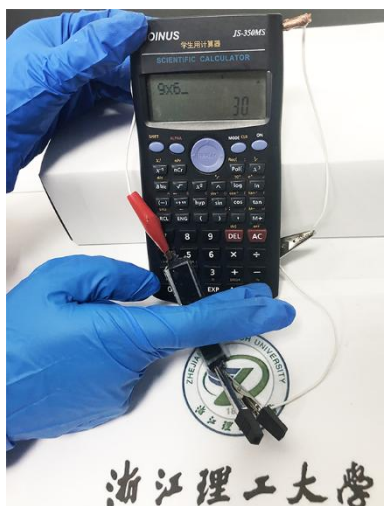

**Figure S6.** The photograph of two assembled flexible solid-state HSC devices connected in series as the power for the calculator.
